# Supplementary material for: Exploration of defined 2-dimensional working electrode shapes through additive manufacturing
Source: Royal Society of Chemistry journal article supplement (doi:10.1039/d2an01412b), 2022-01-01
Supplement: d2an01412b1.pdf [file d2an01412b1.pdf]

**Electronic Supporting Information:**

**Exploration of defined 2-dimensional working electrode shapes  
through additive manufacturing**

Alejandro Garcia-Miranda Ferrari, Nicholas J. Hurst, Elena Bernalte, Robert D. Crapnell,  
Matthew J. Whittingham, Dale A.C. Brownson and Craig E. Banks\*

*Faculty of Science and Engineering, Manchester Metropolitan University, Chester Street,  
M1 5GD, United Kingdom.*

\*To whom correspondence should be addressed.

E-mail: [c.banks@mmu.ac.uk](mailto:c.banks@mmu.ac.uk); Tel: +44(0)1612471196

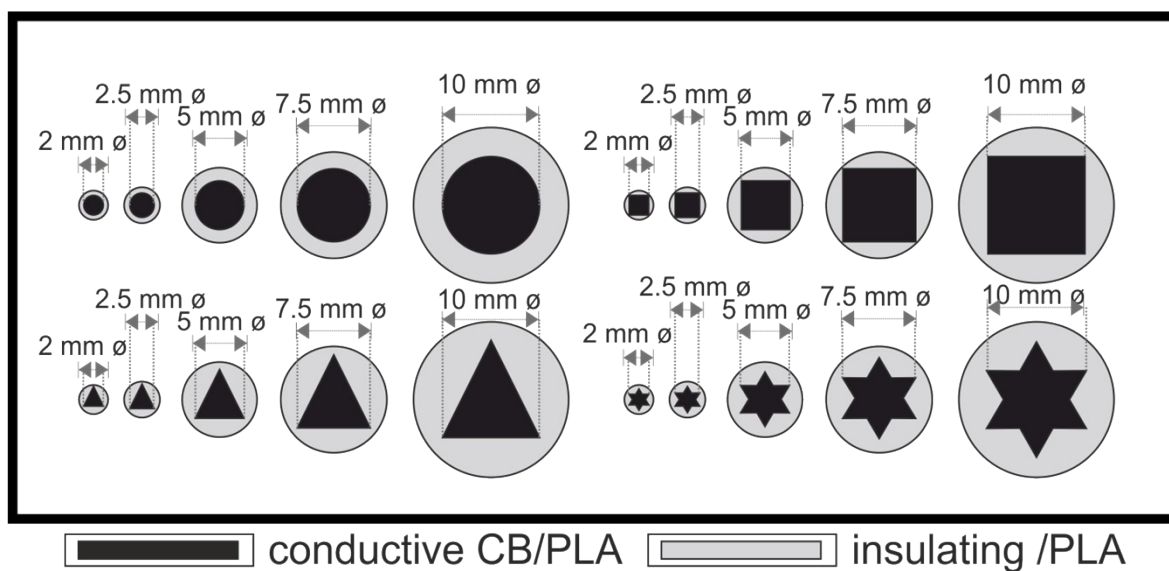

**Figure S1.** Schematic representation of the AMEs with 2, 2.5, 5, 7.5 and 10 mm working electrodes, with their respective shapes in the form of a disc, square, equilateral triangle or a six-point star.

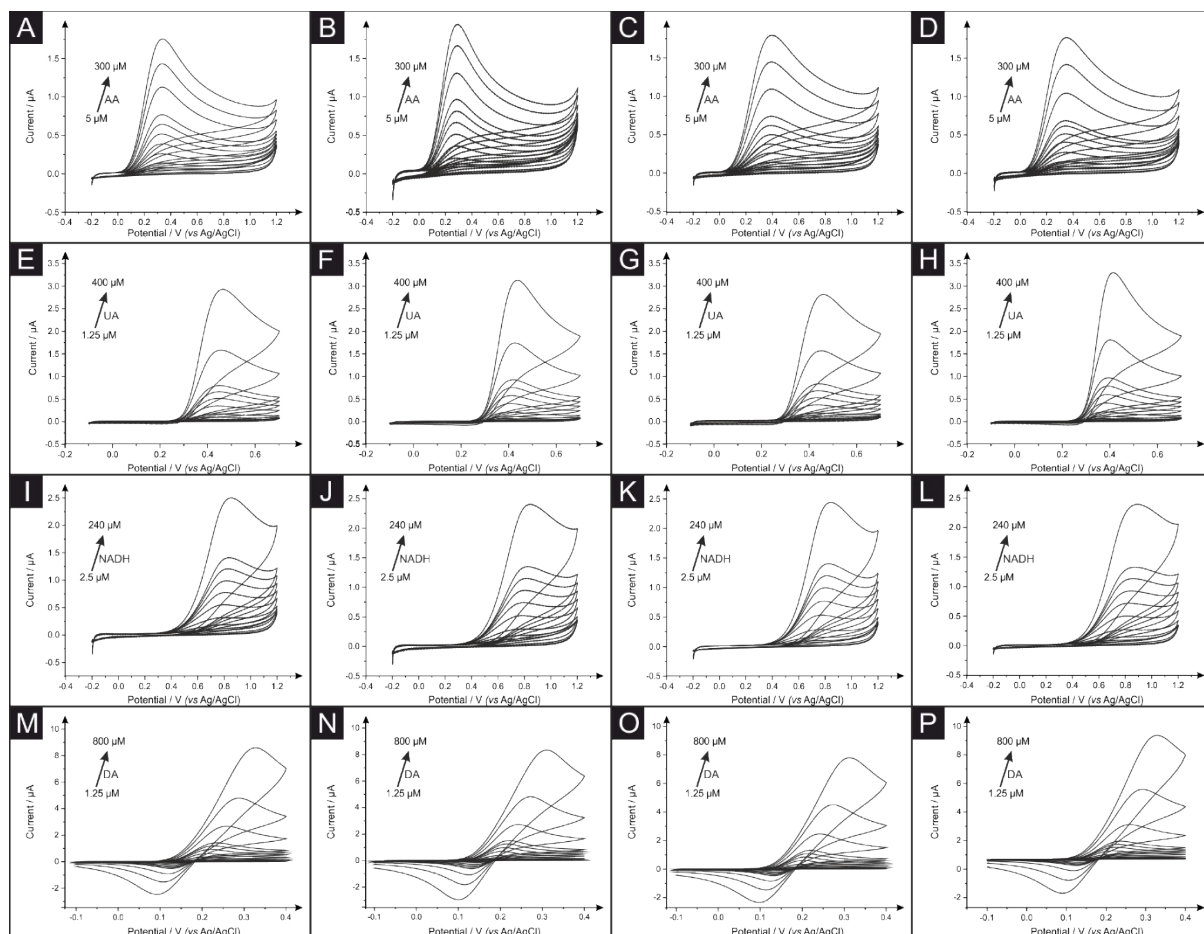

**Figure S2.** Voltammograms from the calibration plots included in Figure 3. A to D shows the respectively responses for the disc, square, triangle and star (A to D) electrodes for AA. E to F depicts the responses for the disc, square, triangle and star (E to F) for UA. NADH responses are included from I to L for the disc, square, triangle and star electrodes respectively. DA responses are shown in M to P for the disc, square, triangle and star electrodes. Scan rate:  $50 \text{ mV s}^{-1}$  (vs. Ag/AgCl).
